# Supplementary material
Source: publisher figshare collection journal article supplement (https://tandf.figshare.com/ndownloader/files/21806865)
Supplement: Supplementary file 1 [file 21806865]

**Suppl. 1:** Constraints used in clinical practice in CNAO for proton therapy treatment

*CNAO*= Centro Nazionale di Adroterapia Oncologica; *D*= maximum dose to 0.03 or 2 cc of the considered volume, *Dmax*= maximum dose to the considered volume; *V*= volume (%) which received the considered dose; *Dmean*= mean dose to the considered volume

| **Organ at risk** | **Dose constraint** | **Reference** |
| --- | --- | --- |
| *Spinal cord* | Dmax < 63 Gy (RBE) (surface)  Dmax < 54 Gy (RBE) (center) | Marucci et al, 2004  Kirkpatrick et al, 2010 |
| *Brainstem* | Dmax < 63 Gy (RBE) (surface)  Dmax < 54 Gy (RBE) (center) | Debus et al, 1997  Mayo et al, 2010 |
| *Optic Chiasm* | Dmax < 56 Gy (RBE) | Mayo et al, 2010 |
| *Optic nerve* | Dmax < 56 Gy (RBE) | Mayo et al, 2010 |
| *Temporal lobe* | D2cc < 71 Gy (RBE) | Pehlivan et al, 2012 |
| *Parotid gland* | Dmean ≤ 26 Gy (RBE) | Deasy et al, 2010 |
| *Cochlea (contralateral)* | Dmean ≤ 45 Gy (RBE) | Bhandare et al, 2010 |
| *Larynx* | V50 Gy (RBE) < 30%  Dmean < 50 Gy (RBE) | Rancati et al, 2010 |

1. [Marucci L](http://www.ncbi.nlm.nih.gov/pubmed?term=Marucci L%5BAuthor%5D&cauthor=true&cauthor_uid=15145175), [Niemierko A](http://www.ncbi.nlm.nih.gov/pubmed?term=Niemierko A%5BAuthor%5D&cauthor=true&cauthor_uid=15145175), [Liebsch NJ](http://www.ncbi.nlm.nih.gov/pubmed?term=Liebsch NJ%5BAuthor%5D&cauthor=true&cauthor_uid=15145175), Aboubaker F, Liu MC, Munzenrider JE. Spinal cord tolerance to high-dose fractionated 3D conformal proton-photon irradiation as evaluated by equivalent uniform dose and dose volume histogram analysis. [Int J Radiat Oncol Biol Phys.](http://www.ncbi.nlm.nih.gov/pubmed/?term=Marucci_L++spinal+cord) 2004;59(2):551-5.
2. Kirkpatrick JP, van der Kogel AJ, Schultheiss TE. Radiation dose–volume effects in the spinal cord. Int J Radiat Oncol Biol Phys. 2010 Mar 1;76(3 Suppl):S42-9.
3. Debus J, Hug EB, Liebsch NJ, O'Farrel D, Finkelstein D, Efird J, Munzenrider JE. Brainstem tolerance to conformal radiotherapy of skull base tumors. [Int J Radiat Oncol Biol Phys.](http://www.ncbi.nlm.nih.gov/pubmed/?term=Marucci_L++spinal+cord) 1997; 39(5):967-75.
4. Mayo C, Yorke E, Merchant TE. Radiation associated brainstem injury. Int J Radiat Oncol Biol Phys, 2010 Mar 1;76(3 Suppl):S36-41.
5. Mayo C, Martel MK, Marks LB, Flickinger J, Nam J, Kirkpatrick J. Radiation dose–volume effects of optic nerves and chiasm. Int J Radiat Oncol Biol Phys, 2010 Mar 1;76(3 Suppl):S28-35.
6. Pehlivan B, Ares C, Lomax AJ, et al. [Temporal lobe toxicity analysis after proton radiation therapy for skull base tumors.](http://www.ncbi.nlm.nih.gov/pubmed/22349042) Int J Radiat Oncol Biol Phys. 2012;83(5):1432-40.
7. Deasy JO, Moiseenko V, Marks L, Chao KS, Nam J, Eisbruch A. Radiotherapy dose–volume effects on salivary gland function. Int J Radiat Oncol Biol Phys. 2010 Mar 1;76(3 Suppl):S58-63.
8. Bhandare N, Jackson A, Eisbruch A, Pan CC, Flickinger JC, Antonelli P, Mendenhall WM. Radiation therapy and hearing loss. Int J Radiat Oncol Biol Phys. 2010 Mar 1;76(3 Suppl):S50-7.
9. Rancati T, Schwarz M, Allen AM, Feng F, Popovtzer A, Mittal B, Eisbruch A. Radiation dose–volume effects in the larynx and pharynx. Int J Radiat Oncol Biol Phys. 2010 Mar 1;76(3 Suppl):S64-9.
